# Supplementary material
Source: Springer Nature journal article supplement (https://www.springermedizin.de/resource/supplementary/13000_2012_525_MOESM3_ESM.pdf/9624908)

Factor 2

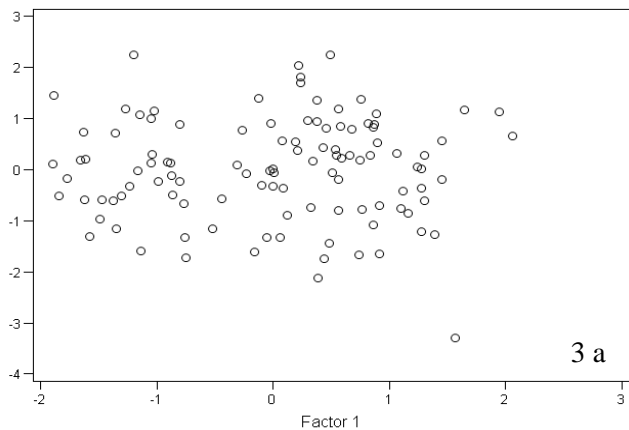

Distribution of Factor1

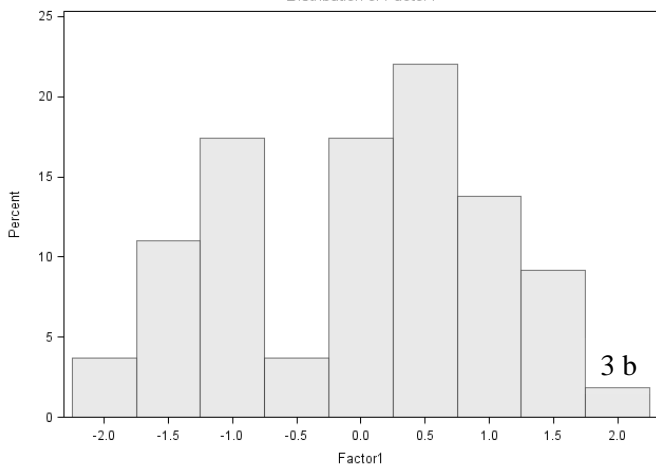

Distribution of Factor2

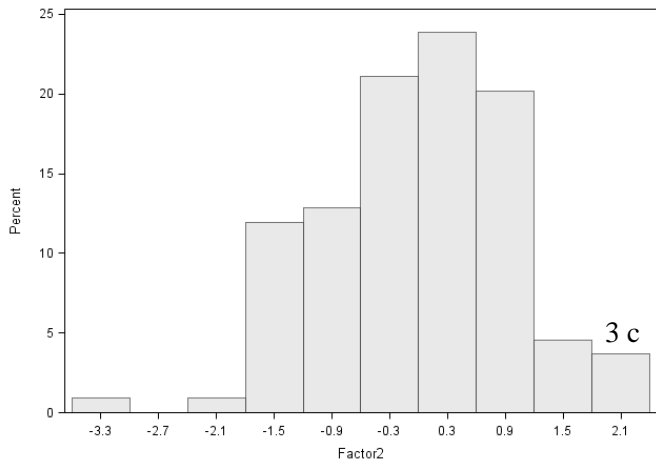

Supplement: MOESM3 [file 9624908]
